# Supplementary material for: High Efficacy of Therapeutic Equine Hyperimmune Antibodies Against SARS-CoV-2 Variants of Concern
Source: PubMed Central journal article supplement (PMC8451950; doi:10.3389/fmed.2021.735853), 2021-09-06
Supplement: Presentation_1.pdf [file Presentation_1.pdf]

**Ger-EPI-ISL-406862**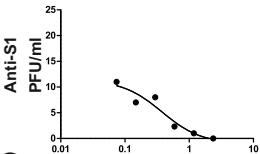 **$\alpha$  B.1.1.7/501Y.V1**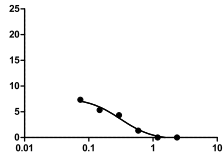 **$\beta$  B.1.351/501Y.V2**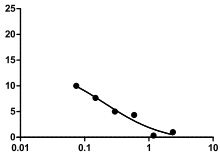 **$\gamma$  P.1/501Y.V3**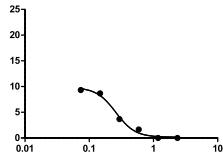 **$\epsilon$  B.1.427/B.1.429**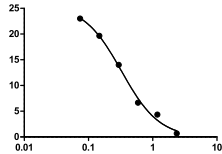 **$\delta$  B.1.617.27/S:478K**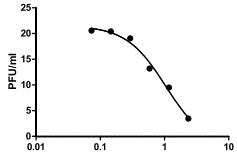

Anti-Mix (S1, N, and SEM)

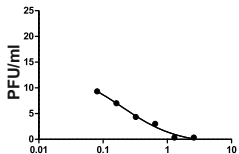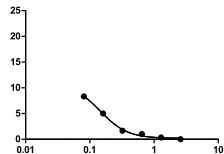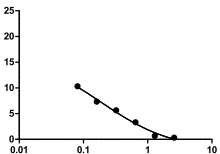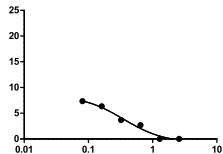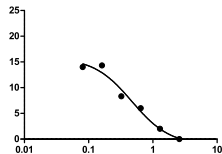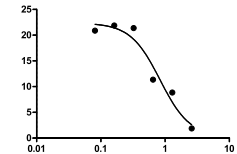Log10 concentration  $\mu\text{g/mL}$ Log10 concentration  $\mu\text{g/mL}$
